# Supplementary material for: Physiological and Ultrastructural Alterations Linked to Intrinsic Mastication Inferiority of Segment Membranes in Satsuma Mandarin (Citrus unshiu Marc.) Fruits
Source: MDPI journal article supplement (doi:10.3390/plants11010039), 2021-12-23
Supplement: s1 [file s1]

**Table S1.** Primers used in qPCR.

| Gene name         | Gene ID                 | Description                        | Primer sequence (5' to 3')                                             |
|-------------------|-------------------------|------------------------------------|------------------------------------------------------------------------|
| <i>CuPME3</i>     | orange1.1g008261<br>m.g | Pectin methylesterase              | Forward: TTTACCACAATGGCACAACCC<br>Reverse: TTCTTCTTCGGCACCTCCACA       |
| <i>CuPME32</i>    | orange1.1g010718<br>m.g | Pectin methylesterase              | Forward: TTTCTTGGTCAGTGCGGTTTC<br>Reverse: ATGAAAGAGGAGGCTGGCACT       |
| <i>CuPME21</i>    | orange1.1g039111<br>m.g | Pectin methylesterase              | Forward: AACCGTTTGCCAACCCACAGA<br>Reverse: GGAAACTGTGCGCCACAACCAC      |
| <i>CuPME48</i>    | orange1.1g039631<br>m.g | Pectin methylesterase              | Forward: TAGCATACCTCAAGGGAACACC<br>Reverse: TGTTCCTTGAGGTATGCTATT      |
| <i>CsPMEI34.2</i> | orange1.1g029436<br>m.g | Pectin methylesterase<br>inhibitor | Forward: GCCCAATCCGCAAAGTCATT<br>Reverse: CCCATCTCATCTAAGCAGTCG        |
| <i>CuPMEI28</i>   | orange1.1g038081<br>m.g | Pectin methylesterase<br>inhibitor | Forward: GGCATTCCACTCCCGCAAACCT<br>Reverse: CAGCCAAGTAAAGGTGGAAGA      |
| <i>CuPMEI34.3</i> | orange1.1g027094<br>m.g | Pectin methylesterase<br>inhibitor | Forward: AGACTTGGGTTAGTGCTGCTT<br>Reverse: AGGCTTCATTCCAGGGCTTTT       |
| <i>CuPMEI3.1</i>  | orange1.1g029211<br>m.g | Pectin methylesterase<br>inhibitor | Forward: GAATAACTTCGTCCGAGATGC<br>Reverse: TTGTCACCGAGACGCCAGCAC       |
| <i>CuPMEI3</i>    | orange1.1g040679<br>m.g | Pectin methylesterase<br>inhibitor | Forward: GCCTCCGCACGCTATCGTCCTA<br>Reverse: ACCGTGACCGTGCTTGCTTCC      |
| <i>β-Actin</i>    | orange1.1g032498<br>m.g | --                                 | Forward: TGACTGATGAGAACTGCCAGAAG<br>Reverse: CCAATTCTCTCTTGAACCTGTCCTT |
